# Supplementary material
Source: ML conference proceedings conference paper supplement (https://proceedings.neurips.cc/paper_files/paper/2018/hash/05a624166c8eb8273b8464e8d9cb5bd9-Abstract.html)
Supplement: Supplementary file [file 05a624166c8eb8273b8464e8d9cb5bd9-Supplemental.zip]

---

# Generalization Bounds for Uniformly Stable Algorithms

---

Vitaly Feldman  
Google Brain

Jan Vondrak  
Stanford University

## Abstract

Uniform stability of a learning algorithm is a classical notion of algorithmic stability introduced to derive high-probability bounds on the generalization error (Bousquet and Elisseeff, 2002). Specifically, for a loss function with range bounded in  $[0, 1]$ , the generalization error of a  $\gamma$ -uniformly stable learning algorithm on  $n$  samples is known to be within  $O((\gamma + 1/n)\sqrt{n \log(1/\delta)})$  of the empirical error with probability at least  $1 - \delta$ . Unfortunately, this bound does not lead to meaningful generalization bounds in many common settings where  $\gamma \geq 1/\sqrt{n}$ . At the same time the bound is known to be tight only when  $\gamma = O(1/n)$ .

We substantially improve generalization bounds for uniformly stable algorithms without making any additional assumptions. First, we show that the bound in this setting is  $O(\sqrt{(\gamma + 1/n) \log(1/\delta)})$  with probability at least  $1 - \delta$ . In addition, we prove a tight bound of  $O(\gamma^2 + 1/n)$  on the second moment of the estimation error. The best previous bound on the second moment is  $O(\gamma + 1/n)$ . Our proofs are based on new analysis techniques and our results imply substantially stronger generalization guarantees for several well-studied algorithms.

## 1 Introduction

We consider the basic problem of estimating the generalization error of learning algorithms. Over the last couple of decades, a remarkably rich and deep theory has been developed for bounding the generalization error via notions of complexity of the class of models (or predictors) output by the learning algorithm. At the same time, for a variety of learning algorithms this theory does not provide satisfactory bounds (even as compared with other theoretical analyses). Most notable among these are continuous optimization algorithms that play the central role in modern machine learning. For example, the standard generalization error bounds for stochastic gradient descent (SGD) on convex Lipschitz functions cannot be obtained by proving uniform convergence for all empirical risk minimizers (ERM) [13, 26]. Specifically, there exist empirical risk minimizing algorithms whose generalization error is  $\sqrt{d}$  times larger than the generalization error of SGD, where  $d$  is the dimension of the problem (without the Lipschitzness assumption the gap is infinite even for  $d = 2$ ) [13]. This disparity stems from the fact that uniform convergence bounds largely ignore the way in which the model output by the algorithm depends on the data. We note that in the restricted setting of generalized linear models one can obtain tight generalization bounds via uniform convergence [15].

Another classical and popular approach to proving generalization bounds is to analyze the stability of the learning algorithm to changes in the dataset. This approach has been used to obtain relatively strong generalization bounds for several convex optimization algorithms. For example, the seminal works of Bousquet and Elisseeff [4] and Shalev-Shwartz et al. [26] demonstrate that for strongly convex losses the ERM solution is stable. The use of stability is also implicit in standard analyses of online convex optimization [26] and online-to-batch conversion [5]. More recently, Hardt et al. [14] showed that for convex smooth losses the solution obtained via (stochastic) gradient descent is

stable. They also conjectured that stability can be used to understand the generalization properties of algorithms used for training deep neural networks.

While a variety of notions of stability have been proposed and analyzed, most only lead to bounds on the expectation or the second moment of the estimation error over the random choice of the dataset (where estimation error refers to the difference between the true generalization error and the empirical error). In contrast, generalization bounds based on uniform convergence show that the estimation error is small with high probability (more formally, the distribution of the error has exponentially decaying tails). This discrepancy was first addressed by Bousquet and Elisseeff [4] who defined the notion of *uniform stability*.

**Definition 1.1.** Let  $A: Z^n \rightarrow \mathcal{F}$  be a learning algorithm mapping a dataset  $S$  to a model in  $\mathcal{F}$  and  $\ell: \mathcal{F} \times Z \rightarrow \mathbb{R}$  be a function such that  $\ell(f, z)$  measures the loss of model  $f$  on point  $z$ . Then  $A$  is said to have uniform stability  $\gamma_n$  with respect to  $\ell$  if for any pair of datasets  $S, S' \in Z^n$  that differ in a single element and every  $z \in Z$ ,  $|\ell(A(S), z) - \ell(A(S'), z)| \leq \gamma_n$ .

We denote the empirical loss of the algorithm  $A$  on  $S = (S_1, \dots, S_n)$  by  $\mathcal{E}_S[\ell(A(S))] \doteq \frac{1}{n} \sum_{i=1}^n \ell(A(S), S_i)$  and its expected loss relative to distribution  $\mathcal{P}$  over  $Z$  by  $\mathcal{E}_{\mathcal{P}}[\ell(A(S))] \doteq \mathbf{E}_{z \sim \mathcal{P}}[\ell(A(S), z)]$ . We denote the estimation error<sup>1</sup> of  $A$  on  $S$  relative to  $\mathcal{P}$  by

$$\Delta_{\mathcal{P}-S}(\ell(A)) \doteq \mathcal{E}_{\mathcal{P}}[\ell(A(S))] - \mathcal{E}_S[\ell(A(S))].$$

We summarize the generalization properties of uniform stability in the below (all proved in [4] although properties (1) and (2) are implicit in earlier work and also hold under weaker stability notions). Let  $A: Z^n \rightarrow \mathcal{F}$  be a learning algorithm that has uniform stability  $\gamma_n$  with respect to a loss function  $\ell: \mathcal{F} \times Z \rightarrow [0, 1]$ . Then for every distribution  $\mathcal{P}$  over  $Z$  and  $\delta > 0$ :

$$\left| \mathbf{E}_{S \sim \mathcal{P}^n} [\Delta_{\mathcal{P}-S}(\ell(A))] \right| \leq \gamma_n; \quad (1)$$

$$\mathbf{E}_{S \sim \mathcal{P}^n} [(\Delta_{\mathcal{P}-S}(\ell(A)))^2] \leq \frac{1}{2n} + 6\gamma_n; \quad (2)$$

$$\mathbf{Pr}_{S \sim \mathcal{P}^n} \left[ \Delta_{\mathcal{P}-S}(\ell(A)) \geq \left( 4\gamma_n + \frac{1}{n} \right) \sqrt{\frac{n \ln(1/\delta)}{2}} + 2\gamma_n \right] \leq \delta. \quad (3)$$

As can be readily seen from eq.(3) the high probability bound is at least a factor  $\sqrt{n}$  larger than the expectation of the estimation error. In addition, the bound on the estimation error implied by eq.(2) is quadratically worse than the stability parameter. We note that eq. (1) does not imply that  $\mathcal{E}_{\mathcal{P}}[\ell(A(S))] \leq \mathcal{E}_S[\ell(A(S))] + O(\gamma_n/\delta)$  with probability at least  $1 - \delta$  since  $\Delta_{\mathcal{P}-S}(\ell(A))$  can be negative and Markov's inequality cannot be used. Such "low-probability" result is known only for ERM algorithms for which Shalev-Shwartz et al. [26] showed that

$$\mathbf{E}_{S \sim \mathcal{P}^n} [|\Delta_{\mathcal{P}-S}(\ell(A))|] \leq O \left( \gamma_n + \frac{1}{\sqrt{n}} \right) \quad (4)$$

Naturally, for most algorithms the stability parameter needs be balanced against the guarantees on the empirical error. For example, ERM solution to convex learning problems can be made uniformly stable by adding a strongly convex term to the objective [26]. This change in the objective introduces an error. In the other example, the stability parameter of gradient descent on smooth objectives is determined by the sum of the rates used for all the gradient steps [14]. Limiting the sum limits the empirical error that can be achieved. In both of those examples the optimal expected error can only be achieved when  $\gamma_n = \theta(1/\sqrt{n})$  (which is also the expected suboptimality of the solutions). Unfortunately, in this setting, eq. (3) gives a vacuous bound and only "low-probability" generalization bounds are known for the first example (since it is ERM and eq. (4) applies).

This raises a natural question of whether the known bounds in eq. (2) and eq. (3) are optimal. In particular, Shalev-Shwartz et al. [26] conjecture that better high probability bounds can be achieved.

<sup>1</sup>Also referred to as the *generalization gap* is several recent works.

It is easy to see that the expectation of the absolute value of the estimation error can be at least  $\gamma_n + \frac{1}{\sqrt{n}}$ . Consequently, as observed already in [4], eq. (3) is optimal when  $\gamma_n = O(1/n)$ . (Note that this is the optimal level of stability for non-trivial learning algorithms with  $\ell$  normalized to  $[0, 1]$ .) Yet both bounds in eq. (2) and eq.(3) are significantly larger than this lower bound whenever  $\gamma_n = \omega(1/n)$ . At the same time, to the best of our knowledge, no other upper or lower bounds on the estimation error of uniformly stable algorithms were previously known.

## 1.1 Our Results

We give two new upper bounds on the estimation error of uniformly stable learning algorithms. Specifically, our bound on the second moment of the estimation error is  $O(\gamma_n^2 + 1/n)$  matching (up to a constant) the simple lower bound of  $\gamma_n + \frac{1}{\sqrt{n}}$  on the first moment. Our high probability bound improves the rate from  $\sqrt{n}(\gamma_n + 1/n)$  to  $\sqrt{\gamma_n + 1/n}$ . This rate is non-vacuous for any non-trivial stability parameter  $\gamma_n = o(1)$  and matches the rate that was previously known only for the second moment (eq. (2)).

For convenience and generality we state our bounds on the estimation error for arbitrary data dependent functions (and not just losses of models). Specifically, let  $M : Z^n \times Z \rightarrow \mathbb{R}$  be an algorithm that is given a dataset  $S$  and a point  $z$  as an input. It can be thought of as computing a real-valued function  $M(S, \cdot)$  and then applying it to  $z$ . In the case of learning algorithms  $M(S, z) = \ell(A(S), z)$  but this notion also captures other data statistics whose choice may depend on the data. We denote the empirical mean  $\mathcal{E}_S[M(S)] \doteq \frac{1}{n} \sum_{i=1}^n M(S, S_i)$ , expectation relative to distribution  $\mathcal{P}$  over  $Z$  by  $\mathcal{E}_{\mathcal{P}}[M(S)] \doteq \mathbf{E}_{z \sim \mathcal{P}}[M(S, z)]$  and the estimation error by

$$\Delta_{\mathcal{P}-S}(M) \doteq \mathcal{E}_{\mathcal{P}}[M(S)] - \mathcal{E}_S[M(S)].$$

Uniform stability for data-dependent functions is defined analogously (Def. 2.1).

**Theorem 1.2.** *Let  $M : Z^n \times Z \rightarrow [0, 1]$  be a data-dependent function with uniform stability  $\gamma_n$ . Then for any probability distribution  $\mathcal{P}$  over  $Z$  and any  $\delta \in (0, 1)$ :*

$$\mathbf{E}_{S \sim \mathcal{P}^n} \left[ (\Delta_{\mathcal{P}-S}(M))^2 \right] \leq 16\gamma_n^2 + \frac{2}{n}; \quad (5)$$

$$\mathbf{Pr}_{S \sim \mathcal{P}^n} \left[ \Delta_{\mathcal{P}-S}(M) \geq 8\sqrt{\left(2\gamma_n + \frac{1}{n}\right) \cdot \ln(8/\delta)} \right] \leq \delta. \quad (6)$$

The results in Theorem 1.2 are stated only for deterministic functions (or algorithms). They can be extended to randomized algorithms in several standard ways [12, 26]. If  $M$  is uniformly  $\gamma$ -stable with high probability over the choice of its random bits then one can obtain a statement which holds with high probability over the choice of both  $S$  and the random bits (e.g. [19]). Alternatively, one can always consider the function  $M'(S, z) = \mathbf{E}_M[M(S, z)]$ . If  $M'(S, z)$  is uniformly  $\gamma$ -stable then Thm. 1.2 can be applied to it. The resulting statement will be only about the expected value of the estimation error with expectation taken over the randomness of the algorithm. Further, if  $M$  is used with independent randomness in each evaluation of  $M(S, S_i)$  then the empirical mean  $\mathcal{E}_S[M(S)]$  will be strongly concentrated around  $\mathcal{E}_S[M'(S)]$  (whenever the variance of each evaluation is not too large). We note that randomized algorithms also allow to extend the notion of uniform stability to binary classification algorithms by considering the expectation of the 0/1 loss.

A natural and, we believe, important question left open by our work is whether the high probability result in eq. (6) is tight.

**Our techniques** The high-probability generalization result in [4] (eq. (3)) is based on a simple observation that as a function of  $S$ ,  $\Delta_{\mathcal{P}-S}(M)$  has the bounded differences property. Replacing any element of  $S$  can change  $\Delta_{\mathcal{P}-S}(M)$  by at most  $2\gamma_n + 1/n$  (where  $\gamma_n$  comes from changing the function  $M(S, \cdot)$  to  $M(S', \cdot)$  and  $1/n$  comes the change in one of the points on which this function is evaluated). Applying McDiarmid's concentration inequality immediately implies concentration with rate  $\sqrt{n}(2\gamma_n + 1/n)$  around the expectation. The expectation, in turn, is small by eq. (1). In contrast, our approach uses stability itself as a tool for proving concentration inequalities. It is based on ideas developed in [2] to prove generalization bounds for differentially private algorithms in the

context of adaptive data analysis [11]. It was recently shown that this proof approach can be used to re-derive and extend several standard concentration inequalities [23, 27].

At a high level, the first step of the argument reduces the task of proving a bound on the tail of a non-negative real-valued random variable to bounding the expectation of the maximum of multiple independent samples of that random variable. We then show that from multiple executions of  $M$  on independently chosen datasets it is possible to select the execution of  $M$  with approximately the largest estimation error in a stable way. That is, uniform stability of  $M$  allows us to ensure that the selection procedure is itself uniformly stable. The selection procedure is based on the exponential mechanism [21] and satisfies differential privacy [9](Def. 2.3). The stability of this procedure allows us to bound the expectation of the estimation error of the execution of  $M$  with approximately the largest estimation error (among the multiple executions). This gives us the desired bound on the expectation of the maximum of multiple independent samples of the estimation error random variable. We remark that the multiple executions and an algorithm for selecting among them exist purely for the purposes of the proof technique and do not require any modifications to the algorithm itself.

Our approach to proving the bound on the second moment of the estimation error is based on two ideas. First we decouple the point on which each  $M(S)$  is estimated from  $S$  by observing that for every dataset  $S$  the empirical mean is within  $2\gamma_n$  of the “leave-one-out” estimate of the true mean. Specifically, our leave-one-out estimator is defined as  $\mathbf{E}_{z \sim \mathcal{P}} [\frac{1}{n} \sum_{i=1}^n M(S^{i \leftarrow z}, S_i)]$ , where  $S^{i \leftarrow z}$  denotes replacing the element in  $S$  at index  $i$  with  $z$ . We then bound the second moment of the estimation error of the leave-one-out estimate by bounding the effect of dependence between the random variables by  $O(\gamma_n^2 + 1/n)$ .

**Applications** We now apply our bounds on the estimation error to several known uniformly stable algorithms in a straightforward way. Our main focus are learning problems that can be formulated as stochastic convex optimization. Specifically, these are problems in which the goal is to minimize the expected loss:  $F_{\mathcal{P}}(w) \doteq \mathbf{E}_{z \sim \mathcal{P}}[\ell(w, z)]$  over  $w \in \mathcal{K} \subset \mathbb{R}^d$  for some convex body  $\mathcal{K}$  and a family of convex losses  $\mathcal{F} = \{\ell(\cdot, z)\}_{z \in \mathcal{Z}}$ . The stochastic convex optimization problem for a family of losses  $\mathcal{F}$  over  $\mathcal{K}$  is the problem of minimizing  $F_{\mathcal{P}}(w)$  for an arbitrary distribution  $\mathcal{P}$  over  $\mathcal{Z}$ .

For concreteness, we consider the well-studied setting in which  $\mathcal{F}$  contains 1-Lipschitz convex functions with range in  $[0, 1]$  and  $\mathcal{K}$  is included in the unit ball. In this case ERM with a strongly convex regularizer  $\frac{\lambda}{2} \|w\|^2$  has uniform stability of  $1/(\lambda n)$  [4, 26]. From here, applying Markov’s inequality to eq. (4), Shalev-Shwartz et al. [26] obtain a “low-probability” generalization bound for the solution. Their bound on the true loss is within  $O(1/\sqrt{\delta n})$  from the optimum with probability at least  $1 - \delta$ . Applying eq. (5) with Chebyshev’s inequality improves the dependence on  $\delta$  quadratically, that is to  $O(1/(\delta^{1/4} \sqrt{n}))$ . Further, using eq. (5) we obtain that for an appropriate choice of  $\lambda$ , the sub-optimality of the solution is at most  $O(\sqrt{\log(1/\delta)}/n^{1/3})$ .

Another algorithm that was shown to be uniformly stable is gradient descent<sup>2</sup> on sufficiently smooth convex functions [14]. The generalization bounds we obtain for this algorithm are similar to those we get for the strongly convex ERM. We note that for the stability-based analysis in this case even “low-probability” generalization bounds were not known for the optimal error rate of  $1/\sqrt{n}$ .

Finally, we show that our results can be used to improve the recent bounds on estimation error of learning algorithms with differentially private prediction. These are algorithms introduced to model privacy-preserving learning in the settings where users only have black-box access to the learned model via a prediction interface [10]. The properties of differential privacy imply that the expectation over the randomness of a predictor  $K: (X \times Y)^n \times X$  of the loss of  $K$  at any point  $x \in X$  is uniformly stable. Specifically, for an  $\epsilon$ -differentially private prediction algorithm, every loss function  $\ell: Y \times Y \rightarrow [0, 1]$ , two datasets  $S, S' \in (X \times Y)^n$  that differ in a single element and  $(x, y) \in X \times Y$ :

$$\left| \mathbf{E}_K[\ell(K(S, x), y)] - \mathbf{E}_M[\ell(K(S', x), y)] \right| \leq e^\epsilon - 1.$$

Therefore, our generalization bounds can be directly applied to the data-dependent function  $M(S, (x, y)) \doteq \mathbf{E}_K[\ell(K(S, x), y)]$ . These bounds can, in turn, be used to get stronger genera-

<sup>2</sup>The analysis in [14] focuses on the stochastic gradient descent and derives uniform stability for the expectation of the loss (over the randomness of the algorithm). However their analysis applies to gradient steps on smooth functions more generally.

lization bounds for one of the learning algorithms proposed in [10] (that has unbounded model complexity).

Additional details of these applications can be found in the supplemental material.

## 1.2 Additional related work

The use of stability for understanding of generalization properties of learning algorithms dates back to the pioneering work of Rogers and Wagner [25]. They showed that expected sensitivity of a classification algorithm to changes of individual examples can be used to obtain a bound on the variance of the leave-one-out estimator for the  $k$ -NN algorithm. Early work on stability focused on extensions of these results to other “local” algorithms and estimators and focused primarily on variance (a notable exception is [8] where high probability bounds on the generalization error of  $k$ -NN are proved). See [7] for an overview. In a somewhat similar spirit, stability is also used for analysis of the variance of the  $k$ -fold cross-validation estimator [3, 16, 17].

A long line of work focuses on the relationship between various notions of stability and learnability in supervised setting (see [24, 26] for an overview). This work employs relatively weak notions of average stability and derives a variety of asymptotic equivalence results. The results in [4] on uniform stability and their applications to generalization properties of strongly convex ERM algorithms have been extended and generalized in several directions (e.g. [18, 28, 30]). Maurer [20] considers generalization bounds for a special case of linear regression with a strongly convex regularizer and a sufficiently smooth loss function. Their bounds are data-dependent and are potentially stronger for large values of the regularization parameter (and hence stability). However the bound is vacuous when the stability parameter is larger than  $n^{-1/4}$  and hence is not directly comparable to ours. Finally, recent work of Abou-Moustafa and Szepesvári [1] gives high-probability generalization bounds similar to those in [4] but using a bound on a high-order moment of stability instead of the uniform stability. We also remark that all these works are based on techniques different from ours.

Uniform stability plays an important role in privacy-preserving learning since a differentially private learning algorithm can usually be obtained one by adding noise to the output of a uniformly stable one (e.g. [6, 10, 29]).

## 2 Preliminaries

For a domain  $Z$ , a dataset  $S \in Z^n$  is an  $n$ -tuple of elements in  $Z$ . We refer to element with index  $i$  by  $S_i$  and by  $S^{i \leftarrow z}$  to the dataset obtained from  $S$  by setting the element with index  $i$  to  $z$ . We refer to a function that takes as an input a dataset  $S \in Z^n$  and a point  $z \in Z$  as a *data-dependent function* over  $Z$ . We think of data-dependent functions as outputs of an algorithm that takes  $S$  as an input. For example in supervised learning  $Z$  is the set of all possible labeled examples  $Z = X \times Y$  and the algorithm  $M$  is defined as estimating some loss function  $\ell_Y : Y \times Y \rightarrow \mathbb{R}_+$  of the model  $h_S$  output by a learning algorithm  $A(S)$  on example  $z = (x, y)$ . That is  $M(S, z) = \ell_Y(h_S(x), y)$ . Note that in this setting  $\mathcal{E}_{\mathcal{P}}[M(S)]$  is exactly the true loss of  $h_S$  on data distribution  $\mathcal{P}$ , whereas  $\mathcal{E}_S[M(S)]$  is the empirical loss of  $h_S$ .

**Definition 2.1.** A data-dependent function  $M : Z^n \times Z \rightarrow \mathbb{R}$  has uniform stability  $\gamma$  if for all  $S \in Z^n$ ,  $i \in [n]$ ,  $z_i, z \in Z$ ,  $|M(S, z) - M(S^{i \leftarrow z_i}, z)| \leq \gamma$ .

This definition is equivalent to having  $M(S, z)$  having sensitivity  $\gamma$  or  $\gamma$ -bounded differences for all  $z \in Z$ .

**Definition 2.2.** A real-valued function  $f : Z^n \rightarrow \mathbb{R}$  has sensitivity at most  $\gamma$  if for all  $S \in Z^n$ ,  $i \in [n]$ ,  $z_i, z \in Z$ ,  $|f(S) - f(S^{i \leftarrow z_i})| \leq \gamma$ .

We will also rely on several elementary properties of differential privacy [9]. In this context differential privacy is simply a form of uniform stability for randomized algorithms.

**Definition 2.3** ([9]). An algorithm  $A : Z^n \rightarrow Y$  is  $\epsilon$ -differentially private if, for all datasets  $S, S' \in Z^n$  that differ on a single element,

$$\forall E \subseteq Y \quad \Pr[A(S) \in E] \leq e^\epsilon \Pr[A(S') \in E].$$

### 3 Generalization with Exponential Tails

Our approach to proving the high-probability generalization bounds is based on the technique introduced by Nissim and Stemmer [22] (see [2]) to show that differentially private algorithms have strong generalization properties. It has recently been pointed out by Steinke and Ullman [27] that this approach can be used to re-derive the standard Bernstein, Hoeffding, and Chernoff concentration inequalities. Nissim and Stemmer [23] used the same approach to generalize McDiarmid's inequality to functions with unbounded (or high) sensitivity.

We prove a bound on the tail of a random variable by bounding the expectation of the maximum of multiple independent samples of the random variable. Specifically, the following simple lemma (see [27] for proof):

**Lemma 3.1.** *Let  $\mathcal{Q}$  be a probability distribution over the reals. Then*

$$\Pr_{v \sim \mathcal{Q}} \left[ v \geq 2 \cdot \mathbf{E}_{v_1, \dots, v_m \sim \mathcal{Q}} [\max\{0, v_1, v_2, \dots, v_m\}] \right] \leq \frac{\ln(2)}{m}.$$

The second step relies on the relationship between the maximum of a set of values and the value chosen by the soft-argmax, which we refer to as the *stable-max*. Specifically, we define

$$\text{stablemax}_\epsilon \{v_1, \dots, v_m\} \doteq \sum_{i \in [m]} v_i \cdot \frac{e^{\epsilon v_i}}{\sum_{\ell \in [m]} e^{\epsilon v_\ell}},$$

where  $\frac{e^{\epsilon v_i}}{\sum_{\ell \in [m]} e^{\epsilon v_\ell}}$  should be thought of as the relative weight assigned to value  $v_i$ . (We remark that this vector of weights is commonly referred to as softmax and soft-argmax. We therefore use stable-max to avoid confusion between the weights and the weighted sum of values.) The first property of the stable-max is that its value is close to the maximum:

$$\text{stablemax}_\epsilon \{v_1, \dots, v_m\} \geq \max\{v_1, \dots, v_m\} - \frac{\ln m}{\epsilon}.$$

The second property that we will use is that the weight (or probability) assigned to each value is stable: it changes by a factor of at most  $e^{2\gamma\epsilon}$  whenever each of the values changes by at most  $\gamma$ . These two properties are known properties of the exponential mechanism [21]. More formally, the exponential mechanism is the randomized algorithm that given values  $\{v_1, \dots, v_m\}$  and  $\epsilon$ , outputs the index  $i$  with probability  $\frac{e^{\epsilon v_i}}{\sum_{\ell \in [m]} e^{\epsilon v_\ell}}$ . We state the properties of the exponential mechanism specialized to our context below.

**Theorem 3.2.** [2, 21] *Let  $f_1, \dots, f_m : Z^n \rightarrow \mathbb{R}$  be  $m$  scoring functions of a dataset each of sensitivity at most  $\Delta$ . Let  $A$  be the algorithm that given a dataset  $S \in Z^n$  and a parameter  $\epsilon > 0$  outputs an index  $\ell \in [m]$  with probability proportional to  $e^{\frac{\epsilon}{2\Delta} \cdot f_\ell(S)}$ . Then  $A$  is  $\epsilon$ -differentially private and, further, for every  $S \in Z^n$ :*

$$\mathbf{E}_{\ell=A(S)} [f_\ell(S)] \geq \max_{\ell \in [m]} \{f_\ell(S)\} - \frac{2\Delta}{\epsilon} \cdot \ln m.$$

We now define the scoring functions designed to select the execution of  $M$  with the worst estimation error. For these purposes our dataset will consist of  $m$  datasets each of size  $n$ . To avoid confusion, we emphasize this by referring to it as multi-dataset and using  $\mathcal{S}$  to denote it. That is  $\mathcal{S} \in Z^{m \times n}$  and we refer to each of the sub-datasets as  $\mathcal{S}_1, \dots, \mathcal{S}_m$  and to an element  $i$  of sub-dataset  $\ell$  as  $\mathcal{S}_{\ell,i}$ .

**Lemma 3.3.** *Let  $M : Z^n \times Z \rightarrow [0, 1]$  be a data-dependent function with uniform stability  $\gamma$ . For a probability distribution  $\mathcal{P}$  over  $Z$ , multi-dataset  $\mathcal{S} \in Z^{m \times n}$  and an index  $\ell \in [m]$  we define the scoring function*

$$f_\ell(\mathcal{S}) \doteq \Delta_{\mathcal{P}-\mathcal{S}_\ell}(M) = \mathcal{E}_{\mathcal{P}}[M(\mathcal{S}_\ell)] - \mathcal{E}_{\mathcal{S}_\ell}[M(\mathcal{S}_\ell)].$$

*Then  $f_\ell$  has sensitivity  $2\gamma + 1/n$ .*

*Proof.* Let  $\mathcal{S}$  and  $\mathcal{S}'$  be two multi-datasets that differ in a single element at index  $i$  in sub-dataset  $k$ . Clearly, if  $k \neq \ell$  then  $\mathcal{S}_\ell = \mathcal{S}'_\ell$  and  $f_\ell(\mathcal{S}) = f_\ell(\mathcal{S}')$ . Otherwise,  $\mathcal{S}_\ell$  and  $\mathcal{S}'_\ell$  differ in a single element. Thus

$$|\mathcal{E}_{\mathcal{P}}[M(\mathcal{S}_\ell)] - \mathcal{E}_{\mathcal{P}}[M(\mathcal{S}'_\ell)]| = \left| \mathbf{E}_{z \sim \mathcal{P}} [M(\mathcal{S}_\ell, z) - M(\mathcal{S}'_\ell, z)] \right| \leq \gamma.$$

and

$$\begin{aligned}
\left| \mathcal{E}_{\mathcal{S}_\ell}[M(\mathcal{S}_\ell)] - \mathcal{E}_{\mathcal{S}'_\ell}[M(\mathcal{S}'_\ell)] \right| &= \left| \frac{1}{n} \sum_{j \in [n]} M(\mathcal{S}_\ell, \mathcal{S}_{\ell,j}) - \frac{1}{n} \sum_{j \in [n]} M(\mathcal{S}'_\ell, \mathcal{S}'_{\ell,j}) \right| \\
&\leq \left| \frac{1}{n} \sum_{j \in [n], j \neq i} (M(\mathcal{S}_\ell, \mathcal{S}_{\ell,j}) - M(\mathcal{S}'_\ell, \mathcal{S}_{\ell,j})) \right| + \frac{1}{n} \cdot |M(\mathcal{S}'_\ell, \mathcal{S}_{\ell,i}) - M(\mathcal{S}'_\ell, \mathcal{S}'_{\ell,i})| \\
&\leq \gamma + \frac{1}{n}.
\end{aligned}$$

□

The final (and new) ingredient of our proof is a bound on the expected estimation error of any uniformly stable algorithm on a sub-dataset chosen in a differentially private way.

**Lemma 3.4.** *For  $\ell \in [m]$ , let  $M_\ell : Z^n \times Z \rightarrow [0, 1]$  be a data-dependent function with uniform stability  $\gamma$ . Let  $A : Z^{n \times m} \rightarrow [m]$  be an  $\epsilon$ -differentially private algorithm. Then for any distribution  $\mathcal{P}$  over  $Z$ , we have that:*

$$e^{-\epsilon} V_{\mathcal{S}} - \gamma \leq \mathbf{E}_{\mathcal{S} \sim \mathcal{P}^{mn}, \ell = A(\mathcal{S})} [\mathcal{E}_{\mathcal{P}}[M_\ell(\mathcal{S}_\ell)]] \leq e^\epsilon V_{\mathcal{S}} + \gamma,$$

where  $V_{\mathcal{S}} \doteq \mathbf{E}_{\mathcal{S} \sim \mathcal{P}^{mn}, \ell = A(\mathcal{S})} [\mathcal{E}_{\mathcal{S}_\ell}[M_\ell(\mathcal{S}_\ell)]]$ .

*Proof.*

$$\begin{aligned}
V_{\mathcal{S}} &= \mathbf{E}_{\mathcal{S} \sim \mathcal{P}^{mn}, \ell = A(\mathcal{S})} \left[ \frac{1}{n} \sum_{i \in [n]} M_\ell(\mathcal{S}_\ell, \mathcal{S}_{\ell,i}) \right] \\
&= \mathbf{E}_{A, \mathcal{S} \sim \mathcal{P}^{mn}} \left[ \frac{1}{n} \sum_{i \in [n]} \sum_{\ell \in [m]} \mathbb{1}(A(\mathcal{S}) = \ell) \cdot M_\ell(\mathcal{S}_\ell, \mathcal{S}_{\ell,i}) \right] \\
&= \frac{1}{n} \sum_{i \in [n]} \sum_{\ell \in [m]} \mathbf{E}_{\mathcal{S} \sim \mathcal{P}^{mn}} \left[ \mathbf{E}_A[\mathbb{1}(A(\mathcal{S}) = \ell)] \cdot M_\ell(\mathcal{S}_\ell, \mathcal{S}_{\ell,i}) \right] \\
&\leq \frac{1}{n} \sum_{i \in [n]} \sum_{\ell \in [m]} \mathbf{E}_{\mathcal{S} \sim \mathcal{P}^{mn}, z \sim \mathcal{P}} \left[ e^\epsilon \cdot \mathbf{E}_A[\mathbb{1}(A(\mathcal{S}^{\ell, i \leftarrow z}) = \ell)] \cdot (M_\ell(\mathcal{S}_\ell^{i \leftarrow z}, \mathcal{S}_{\ell,i}) + \gamma) \right] \\
&= \frac{1}{n} \sum_{i \in [n]} \sum_{\ell \in [m]} \mathbf{E}_{\mathcal{S} \sim \mathcal{P}^{mn}, z \sim \mathcal{P}} \left[ e^\epsilon \cdot \mathbf{E}_A[\mathbb{1}(A(\mathcal{S}) = \ell)] \cdot (M_\ell(\mathcal{S}_\ell, z) + \gamma) \right] \\
&= \mathbf{E}_{\mathcal{S} \sim \mathcal{P}^{mn}, z \sim \mathcal{P}, \ell = A(\mathcal{S})} [e^\epsilon \cdot (M_\ell(\mathcal{S}_\ell, z) + \gamma)] = e^\epsilon \cdot \left( \mathbf{E}_{\mathcal{S} \sim \mathcal{P}^{mn}, z \sim \mathcal{P}, \ell = A(\mathcal{S})} [M_\ell(\mathcal{S}_\ell, z)] + \gamma \right).
\end{aligned}$$

This gives the left hand side of the stated inequality. The right hand side is obtained analogously. □

We are now ready to put the ingredients together to prove the claimed result:

*Proof of eq. (6) in Theorem 1.2.* We choose  $m = \ln(2)/\delta$ . Let  $f_1, \dots, f_m$  be the scoring functions defined in Lemma 3.3. Let  $f_{m+1}(\mathcal{S}) \equiv 0$ . Let  $A$  be the execution of the exponential mechanism with  $\Delta = 2\gamma + 1/n$  on scoring functions  $f_1, \dots, f_{m+1}$  and  $\epsilon$  to be defined later. Note that this corresponds to the setting of Lemma 3.4 with  $M_\ell \equiv M$  for all  $\ell \in [m]$  and  $M_{m+1} \equiv 0$ . By Lemma 3.4 we have that

$$\mathbf{E}_{\mathcal{S} \sim \mathcal{P}^{(m+1)n}} \left[ \mathbf{E}_{\ell = A(\mathcal{S})} [f_\ell(\mathcal{S})] \right] = \mathbf{E}_{\mathcal{S} \sim \mathcal{P}^{(m+1)n}, \ell = A(\mathcal{S})} [\mathcal{E}_{\mathcal{P}}[M_\ell(\mathcal{S}_\ell)] - \mathcal{E}_{\mathcal{S}_\ell}[M_\ell(\mathcal{S}_\ell)]] \leq e^\epsilon - 1 + \gamma.$$

By Theorem 3.2

$$\begin{aligned} \mathbf{E}_{S \sim \mathcal{P}^{mn}} \left[ \max \left\{ 0, \max_{\ell \in [m]} \mathcal{E}_{\mathcal{P}}[M(\mathcal{S}_\ell)] - \mathcal{E}_{\mathcal{S}_\ell}[M(\mathcal{S}_\ell)] \right\} \right] &= \mathbf{E}_{S \sim \mathcal{P}^{mn}} \left[ \max_{\ell \in [0.m]} f_\ell(S) \right] \\ &\leq \mathbf{E}_{S \sim \mathcal{P}^{mn}} \left[ \mathbf{E}_{\ell=A(S)} [f_\ell(S)] \right] + \frac{2\Delta}{\epsilon} \ln(m+1) \leq e^\epsilon - 1 + \gamma + \frac{4\gamma + 2/n}{\epsilon} \ln(m+1). \end{aligned}$$

To bound this expression we choose  $\epsilon = \sqrt{(2\gamma + \frac{1}{n}) \cdot \ln(m+1)} = \sqrt{(2\gamma + \frac{1}{n}) \cdot \ln(e \ln(2)/\delta)}$ . Our bound is at least  $2\epsilon$  and hence holds trivially if  $\epsilon \geq 1/2$ . Otherwise  $(e^\epsilon - 1) \leq 2\epsilon$  and we obtain the following bound on the expectation of the maximum.

$$4\sqrt{\left(2\gamma + \frac{1}{n}\right) \cdot \ln(e \ln(2)/\delta)} + \gamma \leq 4\sqrt{\left(2\gamma + \frac{1}{n}\right) \cdot \ln(8/\delta)}$$

where we used that  $\gamma \leq \sqrt{\gamma}$ . Finally, plugging this bound into Lemma 3.1 we obtain that

$$\Pr_{S \sim \mathcal{P}^n} \left[ \mathcal{E}_{\mathcal{P}}[M(S)] - \mathcal{E}_{\mathcal{S}}[M(S)] \geq 8\sqrt{\left(2\gamma + \frac{1}{n}\right) \cdot \ln(8/\delta)} \right] \leq \frac{\ln(2)}{m} \leq \delta.$$

□

## 4 Second Moment of the Estimation Error

In this section we prove eq. (5) of Theorem 1.2. It will be more convenient to directly work with the unbiased version of  $M$ . Specifically, we define  $L(S, z) \doteq M(S, z) - \mathcal{E}_{\mathcal{P}}[M(S)]$ . Clearly,  $L$  is *unbiased* with respect to  $\mathcal{P}$  in the sense that for every  $S \in Z^n$ ,  $\mathcal{E}_{\mathcal{P}}[L(S)] = 0$ . Note that if the range of  $M$  is  $[0, 1]$  then the range of  $L$  is  $[-1, 1]$ . Further,  $L$  has uniform stability of at most  $2\gamma$  since for two datasets  $S$  and  $S'$  that differ in a single element,

$$|\mathcal{E}_{\mathcal{P}}[M(S)] - \mathcal{E}_{\mathcal{P}}[M(S')]| \leq \left| \mathbf{E}_{z \sim \mathcal{P}} [M(S, z) - M(S', z)] \right| \leq \gamma.$$

Observe that

$$\Delta_{\mathcal{P}-S}(M(S)) = \frac{1}{n} \sum_{i=1}^n (\mathcal{E}_{\mathcal{P}}[M(S)] - M(S, S_i)) = \frac{-1}{n} \sum_{i=1}^n L(S, S_i) = -\mathcal{E}_S[L(S)]. \quad (7)$$

By eq. (7) we obtain that

$$\mathbf{E}_{S \sim \mathcal{P}^n} \left[ (\Delta_{\mathcal{P}-S}(M(S)))^2 \right] = \mathbf{E}_{S \sim \mathcal{P}^n} \left[ (\mathcal{E}_S[L(S)])^2 \right].$$

Therefore eq. (5) of Theorem 1.2 will follow immediately from the following lemma (by using it with stability  $2\gamma$ ).

**Lemma 4.1.** *Let  $L: Z^n \times Z \rightarrow [-1, 1]$  be a data-dependent function with uniform stability  $\gamma$  and  $\mathcal{P}$  be an arbitrary distribution over  $Z$ . If  $L$  is unbiased with respect to  $\mathcal{P}$  then:*

$$\mathbf{E}_{S \sim \mathcal{P}^n} \left[ (\mathcal{E}_S[L(S)])^2 \right] \leq 4\gamma^2 + \frac{2}{n}.$$

Our proof starts by first establishing this result for the leave-one-out estimate.

**Lemma 4.2.** *For a data-dependent function  $L: Z^n \times Z \rightarrow [-1, 1]$ , a dataset  $S \in Z^n$  and a distribution  $\mathcal{P}$ , define*

$$\mathcal{E}_S[L(S^{\leftarrow \mathcal{P}})] \doteq \mathbf{E}_{z \sim \mathcal{P}} \left[ \frac{1}{n} \sum_{i \in [n]} L(S^{i \leftarrow z}, S_i) \right].$$

*If  $L$  has uniform stability  $\gamma$  and is unbiased with respect to  $\mathcal{P}$  then:*

$$\mathbf{E}_{S \sim \mathcal{P}^n} \left[ (\mathcal{E}_S[L(S^{\leftarrow \mathcal{P}})])^2 \right] \leq \gamma^2 + \frac{1}{n}.$$



*Proof.*

$$\begin{aligned}
\mathbf{E}_{S \sim \mathcal{P}^n} \left[ (\mathcal{E}_S [L(S^{\leftarrow \mathcal{P}})])^2 \right] &\leq \mathbf{E}_{S \sim \mathcal{P}^n, z \sim \mathcal{P}} \left[ \left( \frac{1}{n} \sum_{i \in [n]} L(S^{i \leftarrow z}, S_i) \right)^2 \right] \\
&= \frac{1}{n^2} \sum_{i \in [n]} \mathbf{E}_{S \sim \mathcal{P}^n, z \sim \mathcal{P}} \left[ (L(S^{i \leftarrow z}, S_i))^2 \right] + \frac{1}{n^2} \sum_{i, j \in [n], i \neq j} \mathbf{E}_{S \sim \mathcal{P}^n, z \sim \mathcal{P}} [L(S^{i \leftarrow z}, S_i) \cdot L(S^{j \leftarrow z}, S_j)] \\
&\leq \frac{1}{n} + \frac{1}{n^2} \sum_{i, j \in [n], i \neq j} \mathbf{E}_{S \sim \mathcal{P}^n, z \sim \mathcal{P}} [L(S^{i \leftarrow z}, S_i) \cdot L(S^{j \leftarrow z}, S_j)], \tag{8}
\end{aligned}$$

where we used convexity to obtain the first line and the bound on the range of  $L$  to obtain the last inequality. For a fixed  $i \neq j$  and a fixed setting of all the elements in  $S$  with other indices (which we denote by  $S^{-i, j}$ ) we now analyze the cross term

$$v_{i, j} \doteq \mathbf{E}_{S_i, S_j, z \sim \mathcal{P}} [L(S^{i \leftarrow z}, S_i) \cdot L(S^{j \leftarrow z}, S_j)].$$

For  $z \in Z$ , define

$$g(z) = \min_{z_i, z_j \in Z} L(S^{i, j \leftarrow z_i, z_j}, z) + \gamma.$$

(We remark that  $g$  implicitly depends on  $i, j$  and  $S^{-i, j}$ ). Uniform stability of  $L$  implies that

$$\max_{z_i, z_j \in Z} L(S^{i, j \leftarrow z_i, z_j}, z) \leq \min_{z_i, z_j \in Z} L(S^{i, j \leftarrow z_i, z_j}, z) + 2\gamma.$$

This means that for all  $z_i, z_j, z \in Z$ ,

$$|L(S^{i, j \leftarrow z_i, z_j}, z) - g(z)| \leq \gamma. \tag{9}$$

Using this inequality we obtain

$$\begin{aligned}
v_{i, j} &= \mathbf{E}_{S_i, S_j, z \sim \mathcal{P}} [L(S^{i \leftarrow z}, S_i) \cdot L(S^{j \leftarrow z}, S_j)] \\
&= \mathbf{E}_{S_i, S_j, z \sim \mathcal{P}} [(L(S^{i \leftarrow z}, S_i) - g(S_i)) \cdot (L(S^{j \leftarrow z}, S_j) - g(S_j))] + \mathbf{E}_{S_i, S_j, z \sim \mathcal{P}} [g(S_i) \cdot L(S^{j \leftarrow z}, S_j)] \\
&\quad + \mathbf{E}_{S_i, S_j, z \sim \mathcal{P}} [g(S_j) \cdot L(S^{i \leftarrow z}, S_i)] - \mathbf{E}_{S_i, S_j \sim \mathcal{P}} [g(S_i) \cdot g(S_j)] \\
&\leq \gamma^2 + \mathbf{E}_{S_i, S_j, z \sim \mathcal{P}} [g(S_i) \cdot L(S^{j \leftarrow z}, S_j)] + \mathbf{E}_{S_i, S_j, z \sim \mathcal{P}} [g(S_j) \cdot L(S^{i \leftarrow z}, S_i)] - \left( \mathbf{E}_{z' \sim \mathcal{P}} [g(z')] \right)^2.
\end{aligned}$$

Note that  $L$  is unbiased and  $g$  does not depend on  $S_i$  or  $S_j$ . Therefore, for every fixed setting of  $S_i$  and  $z$ ,

$$\mathbf{E}_{S_j \sim \mathcal{P}} [g(S_i) \cdot L(S^{j \leftarrow z}, S_j)] = g(S_i) \cdot \mathcal{E}_{\mathcal{P}} [L(S^{j \leftarrow z})] = 0.$$

Therefore,

$$\mathbf{E}_{S_i, S_j, z \sim \mathcal{P}} [g(S_i) \cdot L(S^{j \leftarrow z}, S_j)] + \mathbf{E}_{S_i, S_j, z \sim \mathcal{P}} [g(S_j) \cdot L(S^{i \leftarrow z}, S_i)] = 0.$$

implying that  $v_{i, j} \leq \gamma^2$ . Substituting this into eq.(8) we obtain the claim.  $\square$

We can now obtain the proof of Lemma 4.1 by observing that for every  $S$ , the empirical mean  $\mathcal{E}_S[L(S)]$  is within  $\gamma$  of our leave-one-out estimator  $\mathcal{E}_S[L(S^{\leftarrow \mathcal{P}})]$ .

*Proof of Lemma 4.1.* Observe that the uniform stability of  $L$  implies that for every  $S$ ,

$$\begin{aligned}
|\mathcal{E}_S[L(S)] - \mathcal{E}_S[L(S^{\leftarrow \mathcal{P}})]| &= \left| \frac{1}{n} \sum_{i \in [n]} L(S, S_i) - \mathbf{E}_{z \sim \mathcal{P}} \left[ \frac{1}{n} \sum_{i \in [n]} L(S^{i \leftarrow z}, S_i) \right] \right| \\
&\leq \frac{1}{n} \sum_{i \in [n]} \mathbf{E}_{z \sim \mathcal{P}} [|L(S, S_i) - L(S^{i \leftarrow z}, S_i)|] \leq \gamma. \tag{10}
\end{aligned}$$

Hence

$$\begin{aligned}
\mathbf{E}_{S \sim \mathcal{P}^n} [(\mathcal{E}_S[L(S)])^2] &= \mathbf{E}_{S \sim \mathcal{P}^n} [(\mathcal{E}_S[L(S^{\leftarrow \mathcal{P}})] + \mathcal{E}_S[L(S)] - \mathcal{E}_S[L(S^{\leftarrow \mathcal{P}})])^2] \\
&\leq 2 \cdot \mathbf{E}_{S \sim \mathcal{P}^n} [(\mathcal{E}_S[L(S^{\leftarrow \mathcal{P}})])^2] + 2 \cdot \mathbf{E}_{S \sim \mathcal{P}^n} [(\mathcal{E}_S[L(S)] - \mathcal{E}_S[L(S^{\leftarrow \mathcal{P}})])^2] \\
&\leq 2 \left( \gamma^2 + \frac{1}{n} \right) + 2\gamma^2 = 4\gamma^2 + \frac{2}{n}.
\end{aligned}$$

where we used the Cauchy-Schwarz to obtain the second line and Lemma 4.2 together with eq. (10) to obtain the third line.  $\square$

## 5 Applications

We now apply our bounds on the estimation error to several known uniformly stable algorithms. Many additional applications can be derived in a similar manner.

### 5.1 Learning via Stochastic Convex Optimization

We consider learning problems that can be formulated as stochastic convex optimization. Specifically, these are problems in which the goal is to minimize the expected loss:

$$F_{\mathcal{P}}(w) \doteq \mathbf{E}_{z \sim \mathcal{P}} [\ell(w, z)],$$

over  $w \in \mathcal{K} \subset \mathbb{R}^d$  for some convex body  $\mathcal{K}$  and a family of convex losses  $\mathcal{F} = \{\ell(\cdot, z)\}_{z \in Z}$ . The stochastic convex optimization problem for  $\mathcal{F}$  is the problem of minimizing  $F_{\mathcal{P}}(w)$  over  $\mathcal{K}$  for an arbitrary distributions  $\mathcal{P}$  over  $Z$ .

Many learning problems can be expressed in or relaxed to this general form. As a result many optimization algorithms are known and the optimal error rates are understood for a variety of families of convex functions. However most of these results are obtained via algorithm-specific techniques such as online-to-batch conversion [5] and stability-based arguments rather than uniform convergence. As it turns out, this is unavoidable. This was first pointed out in the seminal work of Shalev-Shwartz et al. [26] who showed that there exists a gap between the bounds that can be obtained via uniform convergence (or ERM algorithms) and bounds achievable via alternative approaches.

For concreteness, let  $\mathcal{F}$  be the family of all convex 1-Lipschitz losses over the unit Euclidean ball in  $d$  dimension (denoted by  $\mathcal{B}_2^d(1)$ ). It is well-known that in this case the stochastic convex optimization problem can be solved with error  $1/\sqrt{n}$  via projected SGD. At the same time it was shown in [26] that there exists an algorithm that minimizes the empirical error while having the worst case error of  $\Omega\left(\frac{\log d}{n}\right)$ . This has been subsequently strengthened to  $\Omega\left(\frac{d}{n}\right)$  by Feldman [13] who also

showed a lower bound of  $\Omega\left(\sqrt{\frac{d}{n}}\right)$  for obtaining uniform convergence in this setting. Further, with

Lipschitzness assumption replaced by the assumption that functions have range in  $[0, 1]$  the gap becomes infinite even for  $d = 2$  [13].

**Strongly convex ERM** We now revisit the stability results known for this basic setting [4, 26] (for simplicity and without loss of generality we will scale the domain and functions to 1).

**Theorem 5.1** ([26]). *Let  $\mathcal{K} \subseteq \mathcal{B}_2^d(1)$  be a convex body,  $\mathcal{F} = \{\ell(\cdot, z) \mid z \in Z\}$  be a family of 1-Lipschitz,  $\lambda$ -strongly convex loss functions over  $\mathcal{K}$  with range in  $[0, 1]$ . For a dataset  $S \in Z^n$  let  $w_S$  denote the empirical minimizer of loss on  $S$ :  $w_S = \operatorname{argmin}_{w \in \mathcal{K}} \sum_{i \in [n]} \ell(w, S_i)$ . Then the algorithm that given  $S$  outputs  $w_S$  has uniform stability  $\frac{4}{\lambda n}$  with respect to loss  $\ell$ . Further, for every distribution  $\mathcal{P}$  over  $Z$  and  $\delta > 0$ :*

$$\Pr_{S \sim \mathcal{P}^n} \left[ F_{\mathcal{P}}(w_S) \geq \min_{w \in \mathcal{K}} F_{\mathcal{P}}(w) + \frac{4}{\delta \lambda n} \right] \leq \delta.$$

We note that the bound on estimation error is obtained by applying Markov's inequality to eq. (4). Theorem 5.1 requires strong convexity. As pointed out in [26], it is possible to add a strongly convex regularizing term  $\frac{\lambda}{2} \|w\|^2$  to the objective function that has sufficiently small effect on the loss

function while ensuring stability (and generalization). Specifically, by setting  $\lambda = \frac{4}{\sqrt{\delta n}}$  the objective function will change by at most  $\lambda$  since  $w$  is assumed to be in a ball of radius 1. Plugging this value of  $\lambda$  into Thm. 5.1 and accounting for the additional error they get:

**Corollary 5.2** ([26]). *Let  $\mathcal{K} \subseteq \mathcal{B}_2^d(1)$  be a convex body,  $\mathcal{F} = \{\ell(\cdot, z) \mid z \in Z\}$  be a family of convex 1-Lipschitz loss functions over  $\mathcal{K}$  with range in  $[0, 1]$ . For a dataset  $S \in Z^n$  let  $w_S$  denote the empirical minimizer of regularized loss on  $S$ :  $w_{S,\lambda} = \operatorname{argmin}_{w \in \mathcal{K}} \sum_{i \in [n]} \ell(w, S_i) + \frac{\lambda}{2} \|w\|_2^2$ . For every distribution  $\mathcal{P}$  over  $Z$  and  $\delta > 0$  using  $\lambda = \frac{4}{\sqrt{\delta n}}$  gives:*

$$\Pr_{S \sim \mathcal{P}^n} \left[ F_{\mathcal{P}}(w_{S,\lambda}) \geq \min_{w \in \mathcal{K}} F_{\mathcal{P}}(w) + \frac{4}{\sqrt{\delta n}} \cdot \left(1 + \frac{8}{\delta n}\right) \right] \leq \delta.$$

We now spell out the results for these settings implied by our generalization bounds.

**Corollary 5.3.** *In the setting of Theorem 5.1, for some fixed constants  $c_1$  and  $c_2$ :*

$$\Pr_{S \sim \mathcal{P}^n} \left[ F_{\mathcal{P}}(w_S) \geq \min_{w \in \mathcal{K}} F_{\mathcal{P}}(w) + c_1 \left( \frac{1}{\sqrt{\delta \lambda n}} + \frac{1}{\sqrt{n}} \right) \right] \leq \delta,$$

and

$$\Pr_{S \sim \mathcal{P}^n} \left[ F_{\mathcal{P}}(w_S) \geq \min_{w \in \mathcal{K}} F_{\mathcal{P}}(w) + \frac{c_2 \sqrt{\ln(1/\delta)}}{\sqrt{\lambda n}} \right] \leq \delta.$$

The first part of this corollary follows directly from applying Chebyshev's inequality to eq. (5) in Theorem 1.2. To apply our results in the setting of Corollary 5.2 we will use a different choice of  $\lambda$  to minimize the error. Specifically, we will choose  $\lambda = c/\sqrt{\delta n}$  for some constant  $c$  when using the second moment and  $\lambda = c/n^{2/3}$  when using the high probability result.

**Corollary 5.4.** *In the setting of Corollary 5.2 with appropriate choices of  $\lambda$  and some fixed constants  $c_1$  and  $c_2$ :*

$$\Pr_{S \sim \mathcal{P}^n} \left[ F_{\mathcal{P}}(w_{S,\lambda}) \geq \min_{w \in \mathcal{K}} F_{\mathcal{P}}(w) + \frac{c_1}{\delta^{1/4} \sqrt{n}} \right] \leq \delta,$$

and

$$\Pr_{S \sim \mathcal{P}^n} \left[ F_{\mathcal{P}}(w_{S,\lambda}) \geq \min_{w \in \mathcal{K}} F_{\mathcal{P}}(w) + \frac{c_2 \sqrt{\ln(1/\delta)}}{n^{1/3}} \right] \leq \delta.$$

**Gradient descent on smooth functions** We now recall the results of Hardt et al. [14] for convex and smooth functions. These results derive their guarantees from the fact that a gradient step on a sufficiently smooth loss function is non-expansive. That is, for any pair of points  $w$  and  $w'$ , any  $\beta$ -smooth convex function  $f$ , and  $0 \leq \eta \leq 2/\beta$ ,

$$\|(w - \eta \nabla f(w)) - (w' - \eta \nabla f(w'))\| \leq \|w - w'\|.$$

Projection to a convex body is also non-expansive. This implies that the effect of each datapoint  $S_i$  on the loss of the solution can be bounded by  $\sum_t \eta_{t,i} \|\nabla \ell(w_t, S_i)\|$ , where  $\eta_{t,i}$  is the rate with which point  $S_i$  is used at step  $t$ . Hence this analysis can be used for a variety of versions of gradient descent with different rates, arbitrary batch sizes and multiple passes over the data. For most of such algorithms no alternative analyses of estimation error are known. It also means that the estimation error can be bounded without any assumptions on how close the output of the algorithm to the empirical minimum.

For concreteness, we apply the bounds from [14] to projected gradient descent on the empirical objective. Unlike for single-pass algorithms, we are not aware of any other approaches to proving generalization guarantees for this algorithm. For an integer  $T$ , and dataset  $S$ , let  $\text{PGD}_T(S)$  denote the output of the algorithm that starting from  $w_0$  being the origin, performs the following iterative updates for every  $t \in [T]$ :

$$w_{t+1} \leftarrow \text{Project}_{\mathcal{K}} \left( w_t + \frac{1}{\sqrt{T}} \nabla F_S(w_t) \right),$$

where  $F_S(w)$  is the empirical objective function  $\frac{1}{n} \sum_{i=1}^n \ell(w, S_i)$  and  $\text{Project}_{\mathcal{K}}$  denotes projection to  $\mathcal{K}$ . The algorithm returns the average iterate:  $\bar{w}_S \doteq \frac{1}{T} \sum_{t \in [T]} w_t$ .

**Theorem 5.5** ([14]). Let  $\mathcal{K} \subseteq \mathcal{B}_2^d(1)$  be a convex body,  $\mathcal{F} = \{\ell(\cdot, z) \mid z \in Z\}$  be a family of convex 1-Lipschitz and  $\sigma$ -smooth loss functions over  $\mathcal{K}$  with range in  $[0, 1]$ . For an integer  $T$  and a dataset  $S \in Z^n$ , let  $\bar{w}_{S,T} = \text{PGD}_T(S)$ . If  $\sigma \leq 2/\sqrt{T}$  then  $\text{PGD}_T(S)$  has uniform stability  $\sqrt{T}/n$  with respect to loss  $\ell$ . Further,

$$F_S(\bar{w}_{S,T}) \leq \min_{w \in \mathcal{K}} F_S(w) + \frac{2}{\sqrt{T}}.$$

and for every distribution  $\mathcal{P}$  over  $Z$ :

$$\mathbf{E}_{S \sim \mathcal{P}^n} [F_{\mathcal{P}}(\bar{w}_{S,T})] \leq \min_{w \in \mathcal{K}} F_{\mathcal{P}}(w) + \frac{2}{\sqrt{T}} + \frac{\sqrt{T}}{n}.$$

To minimize the expected true loss the algorithm needs to be used with  $T = n/\sqrt{2}$ , which implies that the stability parameter is  $\Omega(1/\sqrt{n})$ . We remark that in this case even “low-probability” generalization results cannot be obtained directly from the bound on the expectation of the true loss.

Applying eq. (5) with Chebyshev’s inequality to the results of Theorem 5.5 gives that for some constant  $c_1$  and every  $\delta > 0$ :

$$\Pr_{S \sim \mathcal{P}^n} \left[ F_{\mathcal{P}}(\bar{w}_{S,T}) \geq \min_{w \in \mathcal{K}} F_{\mathcal{P}}(w) + \frac{2}{\sqrt{T}} + \frac{c_1}{\sqrt{\delta}} \left( \frac{\sqrt{T}}{n} + \frac{1}{\sqrt{n}} \right) \right] \leq \delta.$$

At the same time eq. (6) gives (for some constant  $c_2$ ):

$$\Pr_{S \sim \mathcal{P}^n} \left[ F_{\mathcal{P}}(\bar{w}_{S,T}) \geq \min_{w \in \mathcal{K}} F_{\mathcal{P}}(w) + \frac{2}{\sqrt{T}} + \frac{c_2 T^{1/4} \sqrt{\log(1/\delta)}}{\sqrt{n}} \right] \leq \delta.$$

By optimizing the choice of  $T$  we can get essentially the same rates as we have obtained for the ERM in Corollary 5.4 (although in this case we need a smoothness assumption).

**Corollary 5.6.** In the setting of Theorem 5.5 with appropriate choices of  $T$ , for every distribution  $\mathcal{P}$  over  $Z$ ,  $\delta > 0$ , some fixed constants  $c_1$  and  $c_2$ :

$$\Pr_{S \sim \mathcal{P}^n} \left[ F_{\mathcal{P}}(\bar{w}_{S,T}) \geq \min_{w \in \mathcal{K}} F_{\mathcal{P}}(w) + \frac{c_1}{\delta^{1/4} \sqrt{n}} \right] \leq \delta,$$

and

$$\Pr_{S \sim \mathcal{P}^n} \left[ F_{\mathcal{P}}(\bar{w}_{S,T}) \geq \min_{w \in \mathcal{K}} F_{\mathcal{P}}(w) + \frac{c_2 \sqrt{\ln(1/\delta)}}{n^{1/3}} \right] \leq \delta.$$

## 5.2 Privacy-Preserving Prediction

Our results can also be used to improve the bounds on generalization error of learning algorithms with differentially private prediction. These are algorithms introduced to model privacy-preserving learning in the settings where users only have black-box access to the model via a prediction interface [10]. Formally,

**Definition 5.7** ([10]). Let  $K$  be an algorithm that given a dataset  $S \in (X \times Y)^n$  and a point  $x \in X$  produces a value in  $Y$ . Then  $K$  is  $\epsilon$ -differentially private prediction algorithm if for every  $x \in X$ , the output  $K(S, x)$  is  $\epsilon$ -differentially private with respect to  $S$ .

The properties of differential privacy imply that the expectation over the randomness of  $K$  of the loss of  $K$  at any point is uniformly stable. Specifically, for every  $\epsilon$ -differentially private prediction algorithm, every loss function  $\ell: Y \times Y \rightarrow [0, 1]$ , two datasets  $S$  and  $S'$  that differ in a single element and  $(x, y) \in X \times Y$  we have that

$$\mathbf{E}_K[\ell(K(S, x), y)] \leq e^\epsilon \cdot \mathbf{E}_K[\ell(K(S', x), y)].$$

In particular, this implies that

$$\left| \mathbf{E}_K[\ell(K(S, x), y)] - \mathbf{E}_K[\ell(K(S', x), y)] \right| \leq e^\epsilon - 1.$$

Therefore our generalization bounds can be applied to the data-dependent function  $\mathbf{E}_K[\ell(K(S, x), y)]$ . This gives the following corollary of Theorem 1.2:

**Theorem 5.8.** Let  $K : (X \times Y)^n \times X \rightarrow Y$  be an  $\epsilon$ -differentially private prediction and  $\ell : Y \times Y \rightarrow [0, 1]$  be an arbitrary loss function. For a probability distribution  $\mathcal{P}$  over  $Z$  we define:

$$\Delta_{\mathcal{P}-S}(\mathbf{E}[\ell(K)]) \doteq \mathbf{E}_{(x,y) \sim \mathcal{P}, K} [\ell(K(S, x), y)] - \frac{1}{n} \sum_{i=1}^n \mathbf{E}_K [\ell(K(S, x_i), y_i)].$$

Then for any  $\delta \in (0, 1)$ :

$$\begin{aligned} \mathbf{E}_{S \sim \mathcal{P}^n} [(\Delta_{\mathcal{P}-S}(\mathbf{E}[\ell(K)]))^2] &\leq 16(e^\epsilon - 1)^2 + \frac{2}{n}; \\ \mathbf{Pr}_{S \sim \mathcal{P}^n} \left[ \Delta_{\mathcal{P}-S}(\mathbf{E}[\ell(K)]) \geq 8 \sqrt{\left(2(e^\epsilon - 1) + \frac{1}{n}\right) \cdot \ln(8/\delta)} \right] &\leq \delta. \end{aligned}$$

These bounds are stronger than those obtained in [10] in several parameter regimes (but are more generally incomparable since bounds in [10] are multiplicative).

Dwork and Feldman [10] describe an algorithm for agnostically learning threshold functions on a line with differentially private prediction. They demonstrate that their algorithm achieves low empirical error. The complexity of models that their algorithm produces is unbounded and therefore the estimation error cannot be bounded via uniform convergence. Hence they appeal to generalization properties of differentially private prediction. Theorem 5.8 directly implies stronger generalization bounds for this algorithm (we omit more formal details since they require several additional definitions and the application itself is straightforward).

## References

- [1] Karim T. Abou-Moustafa and Csaba Szepesvári. An exponential tail bound for lq stable learning rules. application to k-folds cross-validation. In *ISAIM*, 2018. URL [http://isaim2018.cs.virginia.edu/papers/ISAIM2018\\_Abou-Moustafa\\_Szepesvari.pdf](http://isaim2018.cs.virginia.edu/papers/ISAIM2018_Abou-Moustafa_Szepesvari.pdf).
- [2] Raef Bassily, Kobbi Nissim, Adam D. Smith, Thomas Steinke, Uri Stemmer, and Jonathan Ullman. Algorithmic stability for adaptive data analysis. In *STOC*, pages 1046–1059, 2016.
- [3] Avrim Blum, Adam Kalai, and John Langford. Beating the hold-out: Bounds for k-fold and progressive cross-validation. In *COLT*, pages 203–208, 1999.
- [4] Olivier Bousquet and André Elisseeff. Stability and generalization. *JMLR*, 2:499–526, 2002.
- [5] N. Cesa-Bianchi, A. Conconi, and C. Gentile. On the generalization ability of on-line learning algorithms. *IEEE Transactions on Information Theory*, 50(9):2050–2057, 2004.
- [6] Kamalika Chaudhuri, Claire Monteleoni, and Anand D. Sarwate. Differentially private empirical risk minimization. *Journal of Machine Learning Research*, 12:1069–1109, 2011.
- [7] L. Devroye, L. Györfi, and G. Lugosi. *A Probabilistic Theory of Pattern Recognition*. Springer, 1996.
- [8] Luc Devroye and Terry J. Wagner. Distribution-free inequalities for the deleted and holdout error estimates. *IEEE Trans. Information Theory*, 25(2):202–207, 1979.
- [9] C. Dwork, F. McSherry, K. Nissim, and A. Smith. Calibrating noise to sensitivity in private data analysis. In *TCC*, pages 265–284, 2006.
- [10] Cynthia Dwork and Vitaly Feldman. Privacy-preserving prediction. *CoRR*, abs/1803.10266, 2018. URL <http://arxiv.org/abs/1803.10266>. Extended abstract in COLT 2018.
- [11] Cynthia Dwork, Vitaly Feldman, Moritz Hardt, Toniann Pitassi, Omer Reingold, and Aaron Roth. Preserving statistical validity in adaptive data analysis. *CoRR*, abs/1411.2664, 2014. Extended abstract in STOC 2015.
- [12] André Elisseeff, Theodoros Evgeniou, and Massimiliano Pontil. Stability of randomized learning algorithms. *Journal of Machine Learning Research*, 6:55–79, 2005. URL <http://www.jmlr.org/papers/v6/elisseeff05a.html>.

- [13] Vitaly Feldman. Generalization of ERM in stochastic convex optimization: The dimension strikes back. *CoRR*, abs/1608.04414, 2016. URL <http://arxiv.org/abs/1608.04414>. Extended abstract in NIPS 2016.
- [14] Moritz Hardt, Ben Recht, and Yoram Singer. Train faster, generalize better: Stability of stochastic gradient descent. In *ICML*, pages 1225–1234, 2016. URL <http://jmlr.org/proceedings/papers/v48/hardt16.html>.
- [15] S. Kakade, K. Sridharan, and A. Tewari. On the complexity of linear prediction: Risk bounds, margin bounds, and regularization. In *NIPS*, pages 793–800, 2008.
- [16] Satyen Kale, Ravi Kumar, and Sergei Vassilvitskii. Cross-validation and mean-square stability. In *Innovations in Computer Science - ICS*, pages 487–495, 2011. URL <http://conference.itcs.tsinghua.edu.cn/ICS2011/content/papers/31.html>.
- [17] Ravi Kumar, Daniel Lokshtanov, Sergei Vassilvitskii, and Andrea Vattani. Near-optimal bounds for cross-validation via loss stability. In *ICML*, pages 27–35, 2013. URL <http://jmlr.org/proceedings/papers/v28/kumar13a.html>.
- [18] Tongliang Liu, Gábor Lugosi, Gergely Neu, and Dacheng Tao. Algorithmic stability and hypothesis complexity. In *ICML*, pages 2159–2167, 2017. URL <http://proceedings.mlr.press/v70/liu17c.html>.
- [19] Ben London. A pac-bayesian analysis of randomized learning with application to stochastic gradient descent. In *NIPS*, pages 2935–2944, 2017.
- [20] Andreas Maurer. A second-order look at stability and generalization. In *COLT*, pages 1461–1475, 2017. URL <http://proceedings.mlr.press/v65/maurer17a.html>.
- [21] Frank McSherry and Kunal Talwar. Mechanism design via differential privacy. In *FOCS*, pages 94–103, 2007.
- [22] Kobbi Nissim and Uri Stemmer. On the generalization properties of differential privacy. *CoRR*, abs/1504.05800, 2015.
- [23] Kobbi Nissim and Uri Stemmer. Concentration bounds for high sensitivity functions through differential privacy. *CoRR*, abs/1703.01970, 2017. URL <http://arxiv.org/abs/1703.01970>.
- [24] Tomaso Poggio, Ryan Rifkin, Sayan Mukherjee, and Partha Niyogi. General conditions for predictivity in learning theory. *Nature*, 428(6981):419–422, 2004.
- [25] W. H. Rogers and T. J. Wagner. A finite sample distribution-free performance bound for local discrimination rules. *The Annals of Statistics*, 6(3):506–514, 1978.
- [26] Shai Shalev-Shwartz, Ohad Shamir, Nathan Srebro, and Karthik Sridharan. Learnability, stability and uniform convergence. *The Journal of Machine Learning Research*, 11:2635–2670, 2010.
- [27] Thomas Steinke and Jonathan Ullman. Subgaussian tail bounds via stability arguments. *arXiv preprint arXiv:1701.03493*, 2017. URL <https://arxiv.org/abs/1701.03493>.
- [28] Rosasco Lorenzo Wibisono, Andre and Tomaso Poggio. Sufficient conditions for uniform stability of regularization algorithms. Technical Report MIT-CSAIL-TR-2009-060, MIT, 2009.
- [29] Xi Wu, Fengan Li, Arun Kumar, Kamalika Chaudhuri, Somesh Jha, and Jeffrey Naughton. Bolt-on differential privacy for scalable stochastic gradient descent-based analytics. In *(SIGMOD)*, pages 1307–1322, 2017.
- [30] Tong Zhang. Leave-one-out bounds for kernel methods. *Neural Computation*, 15(6):1397–1437, 2003.
